# Supplementary material
Source: PubMed Central journal article supplement (PMC3336799)
Supplement: supp_111.044255_Supplemental_Figure_1.pdf [file supp_111.044255_Supplemental_Figure_1.pdf]

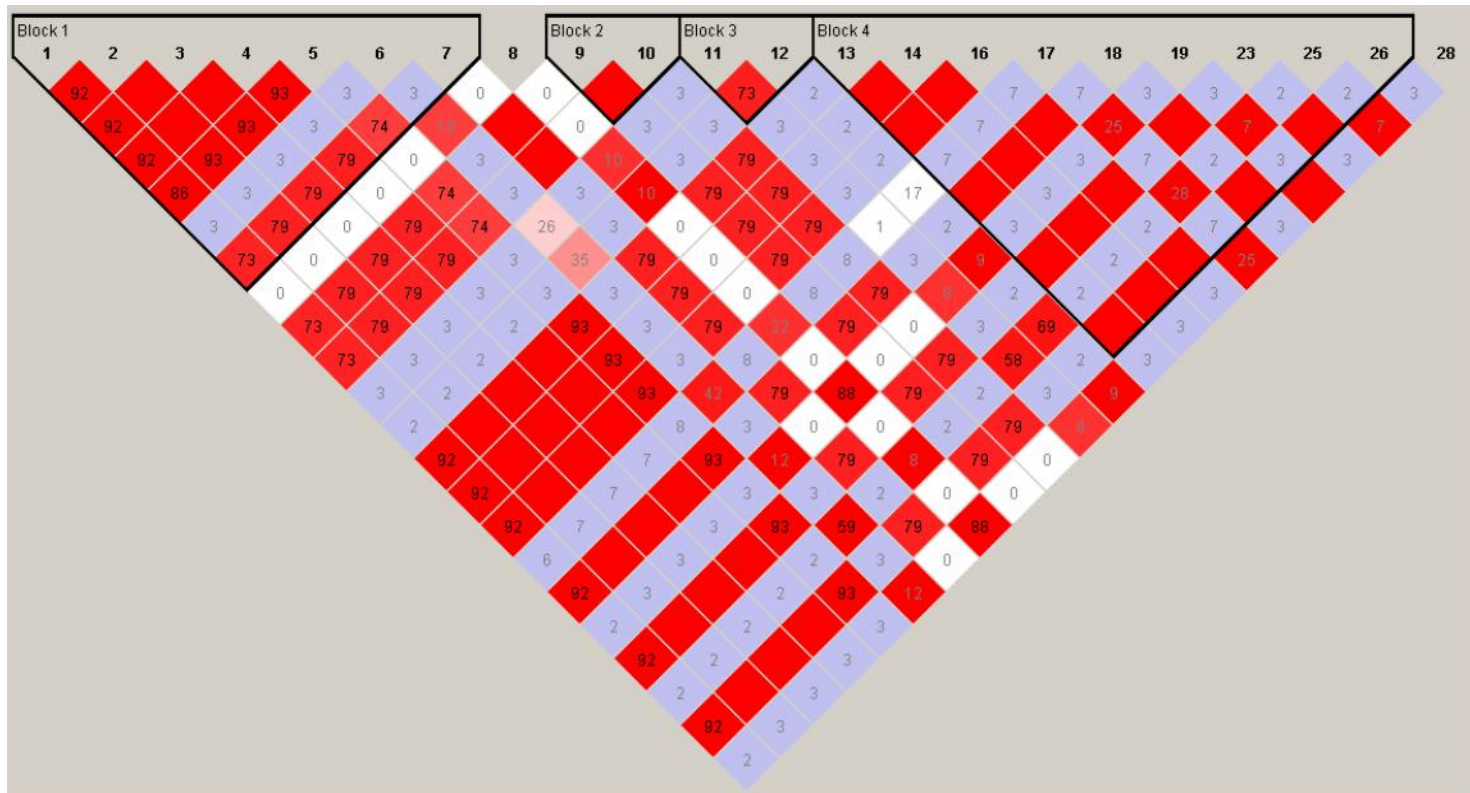

“CYP2C9 promoter variable number tandem repeat polymorphism (pVNTR) regulates mRNA expression in human livers” by D. Wang, X. Sun, Y. Gong, B.E. Gawronski, T.Y. Langae, M.H.A. Shahin, S.I. Khalifa and J.A. Johnson, Drug Metabolism and Disposition.

Supplemental Figure 1. LD plot and haplotype structure of CYP2C9 promoter SNPs
