# Supplementary material
Source: PubMed Central journal article supplement (PMC3336799)
Supplement: supp_111.044255_Supplemental_Figure_2.pdf [file supp_111.044255_Supplemental_Figure_2.pdf]

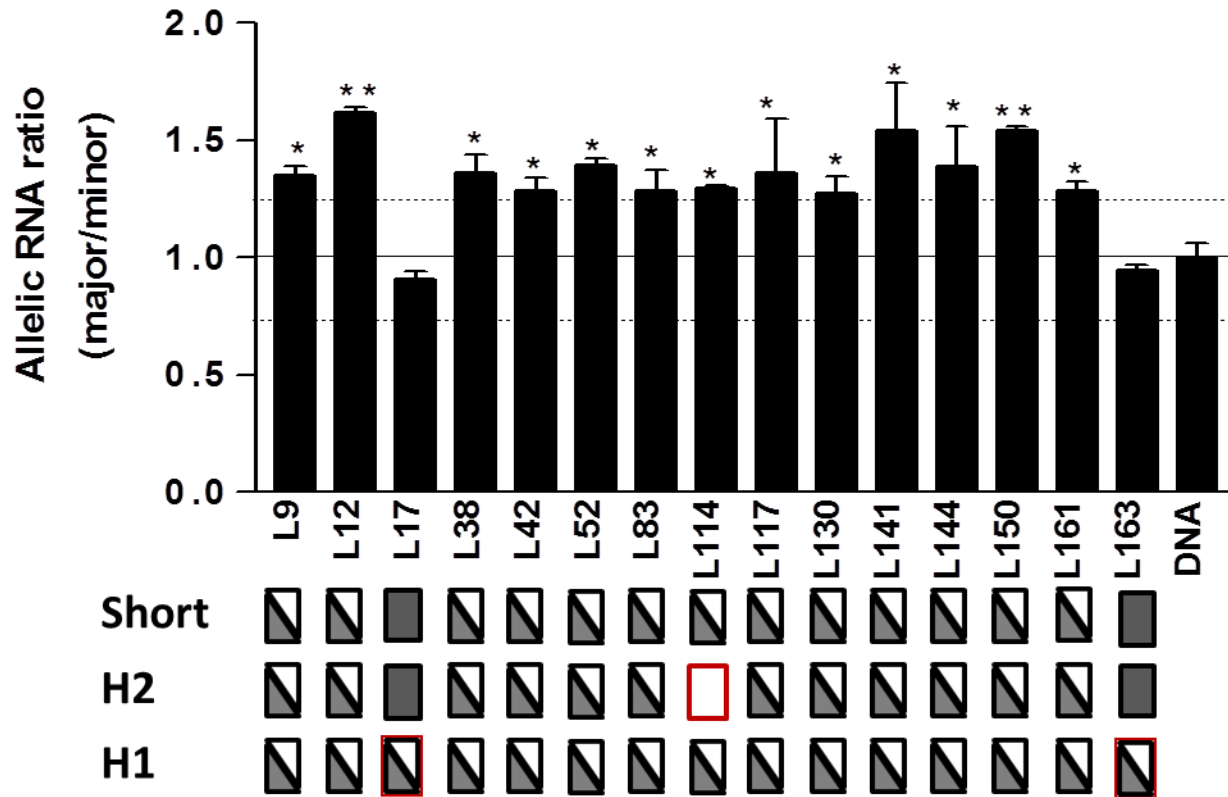

“CYP2C9 promoter variable number tandem repeat polymorphism (pVNTR) regulates mRNA expression in human livers” by D. Wang, X. Sun, Y. Gong, B.E. Gawronski, T.Y. Langaee, M.H.A. Shahin, S.I. Khalifa and J.A. Johnson, Drug Metabolism and Disposition.

Supplemental Figure 2. Correlation between allelic CYP2C9 RNA expression imbalance and heterozygosity of short allele, haplotype 1(H1) and haplotype 2 (H2). Wild-type homozygotes, heterozygotes and minor allele homozygotes show as Note discrepancies for H1 (L17 and L163) and H2 (L114).
