# Supplementary material
Source: PubMed Central journal article supplement (PMC3336799)
Supplement: supp_111.044255_Supplemental_Figure_3.pdf [file supp_111.044255_Supplemental_Figure_3.pdf]

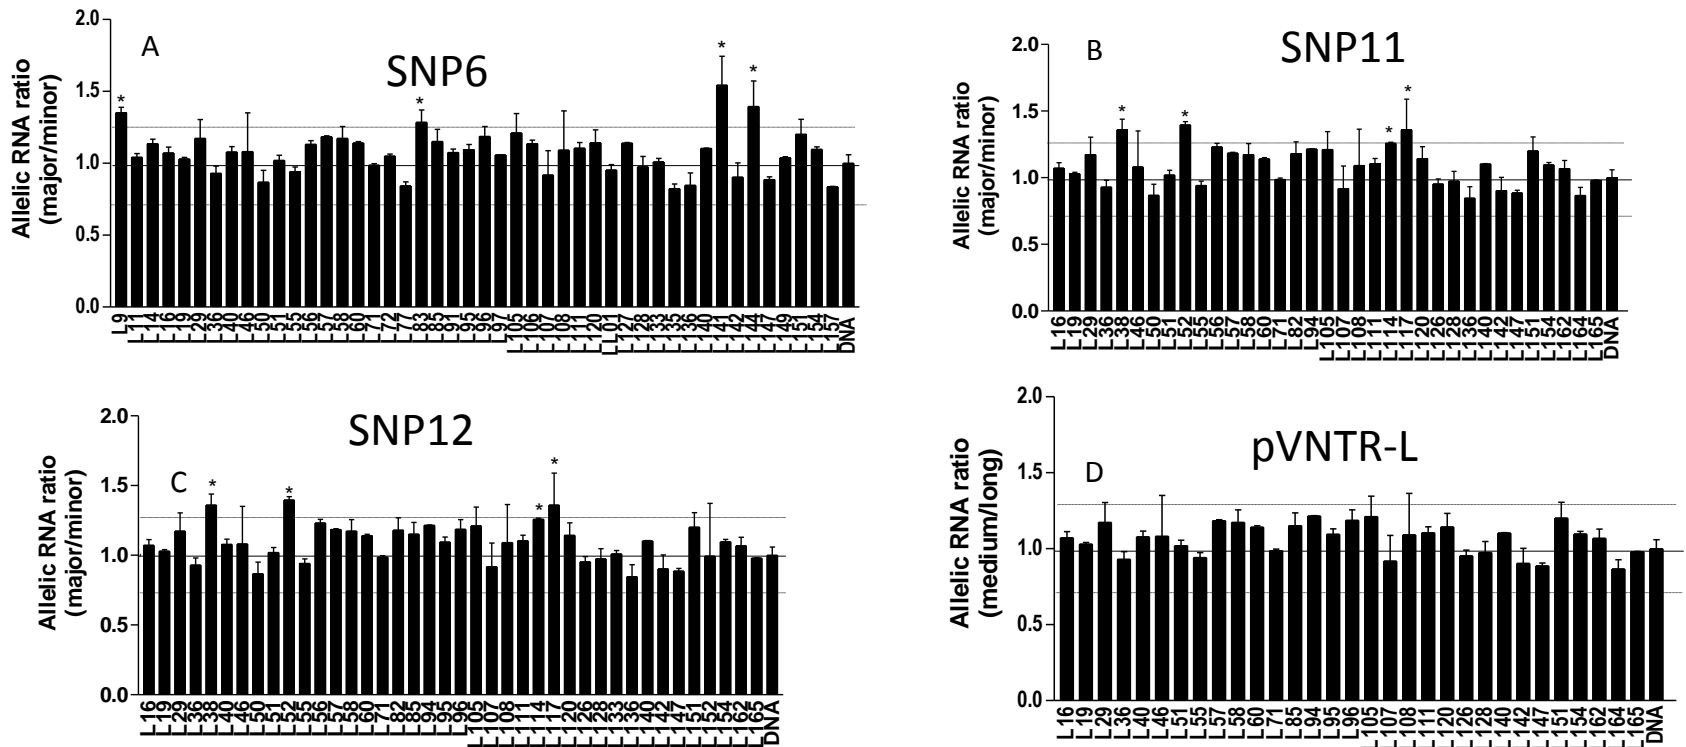

“CYP2C9 promoter variable number tandem repeat polymorphism (pVNTR) regulates mRNA expression in human livers” by D. Wang, X. Sun, Y. Gong, B.E. Gawronski, T.Y. Langae, M.H.A. Shahin, S.I. Khalifa and J.A. Johnson, Drug Metabolism and Disposition.

Supplemental Figure 3. Allelic RNA ratios in samples heterozygous for SNP6 (A), SNP11 (B), SNP12 (C) and promoter long allele (D). Only eight samples (L9, L38, L52, L83, L114, L117, L141 and L144) showed allelic RNA ratio significantly different from 1. Each of these eight samples were heterozygous for the pVNTR-S allele (see Supplemental Figure 2).
