# Supplementary material
Source: PubMed Central journal article supplement (PMC3336799)
Supplement: supp_111.044255_Supplemental_Table1.pdf [file supp_111.044255_Supplemental_Table1.pdf]

"CYP2C9 promoter variable number tandem repeat polymorphism (pVNTR) regulates mRNA expression in human livers" by D. Wang, X. Sun, Y. Gong, B.E. Gawronski, T.Y. Langaee, M.H.A. Shahin, S.I. Khalifa and J.A. Johnson, Drug Metabolism and Disposition

**Supplemental Table 1. Primers and PCR conditions**

**1. Genotyping using Snapshot**

**PCR primers**

|                  |                                 |                                                                                                           |
|------------------|---------------------------------|-----------------------------------------------------------------------------------------------------------|
| SNP1 & SNP2      | forward<br>reverse<br>condition | TGTCCCACTGTAAGGTTTTTCAGG<br>TGCCCTTGTTTCGTTGTTTCTATT<br>Denville PCR mix, 60°C annealing, ext 2min        |
| SNP3 & SNP4      | forward<br>reverse<br>condition | CAAAGAGAAAACACCAGACCCATA<br>CACCTGTGGATATGATGATGAGAC<br>Denville PCR mix, 60°C annealing, ext 1 min       |
| SNP5 & SNP6      | forward<br>reverse<br>condition | AGTATCATTTATATTAGCACC<br>TGCATTTTATATTTGGATCTA<br>Denville PCR mix, 56°C annealing, ext 1.5 min           |
| SNP7, SNP9-SNP11 | forward<br>reverse<br>condition | GGTCTTTTCAACGAAGACTAATGGAGT<br>CAAGCCCTAGCAACAAATAATC<br>Takara Primestar HS, 68°C annealing, ext 1.5 min |
| SNP12            | forward<br>reverse<br>condition | TTTCAAAGCCTACTCTAATCCACC<br>CACATCTCAGTCCAAATGATCAGG<br>Sigma PCR mix, 60°C annealing, ext 1min           |
| SNP13 - SNP18    | forward<br>reverse<br>condition | AAGGTCTAGGAAGGAGCCGC<br>GCCACACAGTCATAGCTGG<br>Sigma PCR mix, 60°C annealing, ext 1.5 min                 |
| SNP19 & SNP 20   | forward<br>reverse<br>condition | TCCCTCCTAGTTTCGTTTCTCTTC<br>AAGGTCAGTGATATGGAGTAGGGT<br>Sigma PCR mix, 55°C annealing, ext 1min           |
| SNP21            | forward<br>reverse<br>condition | TCTGGTTAGAATTGATCCTCTGGT<br>ACAAATCACAATTCACAAGCAG<br>Sigma PCR mix, 55°C annealing, ext 1min             |
| SNP22 - SNP24    | forward<br>reverse<br>condition | TGTTTGGATACCTTCATGATTCA<br>GGAGTTGCAGTGTAGGAGAAACA<br>Sigma PCR mix, 55°C annealing, ext 1min             |
| SNP25            | forward<br>reverse<br>condition | CACTGTTCTGAATGCCTGTGTACA<br>AAGAATTGGATTAACCCCAAAGT<br>Sigma PCR mix, 60°C annealing, ext 1min            |

|               |           |                                         |
|---------------|-----------|-----------------------------------------|
| SNP26 - SNP28 | forward   | AGGAGTAACTGCTCTCTGTGTTTGCTA             |
|               | reverse   | TGAAACATAGGAACTCTCCGTAAT                |
|               | condition | Sigma PCR mix, 55°C annealing, ext 1min |

**Primer extension primers**

|       |                                                 |
|-------|-------------------------------------------------|
| SNP1  | TGTGTTCTTCTACGACTCATTTTCTTTTA                   |
| SNP2  | GCACATAATACGGAACTACAAAAAGTA                     |
| SNP3  | CCCCATAAAATGAGTTAAGAATAGAAGAATT                 |
| SNP4  | TTTTTTTTTTTAAATAAAAGATTAGCAAATTGCATCCAAT        |
| SNP5  | GATATAAATAAATACACAAATATTTTCATGTTTCATG           |
| SNP6  | TCGAGACCATCCTGGCTAACA                           |
| SNP7  | TTTTACTACAATGAAGGTATAATCCATGAAATAAAGAAT         |
| SNP9  | CATTGGGGTTTTAGTTTGCAGGTC                        |
| SNP10 | TTTTTTTTTTTTGTTTACCACATTATCTGGTAGTTGTGCTC       |
| SNP11 | AAGGCTACATACTGTATGATTCCAACC                     |
| SNP12 | TTTTTTTTTTGGAGTATCAACATTAAGCCCTCCA              |
| SNP13 | TTTTTTTTTTTTTTCATGAGTCAGGGACCAAGTTA             |
| SNP14 | TTTTTTTTTTTTTTTTTTTTTTTTTGTCTTTCTTGCCTGTATAAAGG |
| SNP15 | TCAAGGCTCAGCTTCCTCATTC                          |
| SNP16 | TTTTTTTTTTGTCCCTTTGAATCTCTCAATTACCT             |
| SNP17 | TTTTTTTGTGATTTCCCTACCTCCCATCTT                  |
| SNP18 | CGTTTCACTTCTGCAGTGATGGA                         |
| SNP19 | TTTTTTTTTTTTTTTTTTTTTTGGGAAGAGGAGCATTGAGGAC     |
| SNP20 | TTTTTTTTTTTTTTTTTTTTTTTTTCTCAACTCCTCCACAAGGCAG  |
| SNP21 | TTGCTTCTGATGAAATGGAGA                           |
| SNP22 | TGCATGCAGGGGCTCC                                |
| SNP23 | GTGCACGAGGTCCAGAGATAC                           |
| SNP24 | CAGGCTGGTGGGAGAAG                               |
| SNP25 | GCCCAATAATTAGGATGTATCATGA                       |
| SNP26 | TTTTTGCGGCACAGAGGCAAA                           |
| SNP27 | TTTTTTTTTTTTTCTTCTACCAGCTGTGCTTCATT             |
| SNP28 | TTTTTTTTTAATGCCTTTTCTCACCTGTATCT                |

note: for multiplex purpose, different number of Ts were added to the 5' to adjust the length of primers

Multiplex groups:

group 1: SNP1+SNP3+SNP4

group2: SNP2+SNP5+SNP6

group3: SNP7+SNP9

group4: SNP10+SNP11+SNP12

group5: SNP13+SNP14+SNP15+SNP16+SNP17+SNP18

group6: SNP19+SNP20+SNP21+SNP22+SNP23

group7: SNP24+SNP26+SNP27+SNP28

**2. Genotyping using allele specific PCR**

|      |                  |                                           |
|------|------------------|-------------------------------------------|
| SNP8 | forward (common) | CTTGATTTAAAAATGGGCAACAGAT                 |
|      | reverse (wt)     | CAGGTCCGTAGTGACGTTTAATCAT                 |
|      | Reverse (SNP)    | CAGGTCCGTAGTGACGTTTAATCAC                 |
|      | condition        | Cyber green mix, 60°C annealing, ext 1min |

### 3. Genotyping using FAM labeled primer

|                 |               |                                                    |
|-----------------|---------------|----------------------------------------------------|
| promoter repeat | forward (FAM) | TGTAGTCCCAGGTTGTCAAGAGG                            |
|                 | reverse       | CCAGTCTCTGTCTTTTCATCTCATTC                         |
|                 | condition     | Sigma Jumpstart PCR mix, 60°C annealing, ext 1 min |
|                 | PCR products  | long=512~522, medium=453~461, short=417~434        |

### 4. Sequencing

#### PCR primers

|                                       |           |                                                |
|---------------------------------------|-----------|------------------------------------------------|
| Promoter fragment 1<br>-6343 to -3518 | forward   | AGGGAACCAGAGAAAGAAGGACA                        |
|                                       | reverse   | TGGATTTTAGCCATTGTATAAGTGTGTAG                  |
|                                       | condition | Takara prime star HS, 68°C annealing, ext 3min |
| Promoter fragment 2<br>-3646 to -44   | forward   | CTCACCCAAGAAGAAATACAGATGG                      |
|                                       | reverse   | CCTTTTATAAACTCCATGCTAATTCG                     |
|                                       | condition | Takara prime star HS, 68°C annealing, ext 4min |

#### Sequencing primers

##### fragment 1

|       |                               |
|-------|-------------------------------|
| seq 1 | AGGGAACCAGAGAAAGAAGGACA       |
| seq 2 | GAAAAGTCTCATCATCATATCCACAGG   |
| seq 3 | AGTATCATTTATATTAGCACC         |
| seq 4 | TGGATTTTAGCCATTGTATAAGTGTGTAG |

##### fragment 2

|       |                                |
|-------|--------------------------------|
| seq 5 | CTCACCCAAGAAGAAATACAGATGG      |
| seq 6 | TTCAAAAGCCTACTCTAATCCACC       |
| seq 7 | AAGGTCTAGGAAGGAGCCGC           |
| seq 8 | GTTAGAATCCCTGTTAAAAATGACCAGTAA |
| seq 9 | CCTTTTATAAACTCCATGCTAATTCG     |

### 5. Primers for cloning

|                                     |                         |                                                       |
|-------------------------------------|-------------------------|-------------------------------------------------------|
| reporter gene, 5P<br>-4512 to -3025 | forward (add XhoI site) | CCGCTCGAGCGGTCTTTTCAACGAAGACTAATGGAGT                 |
|                                     | reverse (add NcoI site) | CATGCCATGGTGG CAAGCCCTAGCAACAAATAATC                  |
|                                     | condition               | Takara prime star HS, 68°C annealing, ext 1.5 min     |
| reporter gene, 3P<br>-3646 to -48   | forward (add XhoI site) | CCGCTCGAGCCTCACCCAAGAAGAAATACAGATGG                   |
|                                     | reverse (add NcoI site) | CATGCCATGGTGG CCTTTTATAAACTCCATGCTAATTCG              |
|                                     | condition               | Takara prime star HS, 68°C annealing, ext 4 min       |
| repeat region topo clon             | forward                 | GGTCTTTTCAACGAAGACTAATGGAGT                           |
|                                     | reverse                 | TGGATTTTAGCCATTGTATAAGTGTGTAG                         |
|                                     | condition               | Takara prime star HS, 68°C annealing, ext 1.5 min     |
| CAR V1 cDNA                         | forward                 | AGATCAGAGGAAAACCAGCAACAG                              |
|                                     | reverse                 | CCAGTGTATCCAGGGTGTCCA                                 |
|                                     | condition               | Sigma Jump start PCR mix, 60 C annealing, ext 1.5 min |
| HNF1 $\alpha$ cDNA                  | forward                 | GGCAGCCGAGCCATGGTTTC                                  |
|                                     | reverse                 | GCCCAGGTGCCGTGGTACTG                                  |

|                    |           |                                                       |
|--------------------|-----------|-------------------------------------------------------|
|                    | condition | Takara prime star HS, 68°C annealing, ext 2 min       |
| HNF4 $\alpha$ cDNA | forward   | GGCGTGGAGGCAGGG                                       |
|                    | reverse   | TTAGAACAGTGACTGGCACGTG                                |
|                    | condition | Sigma Jump start PCR mix, 60 C annealing, ext 1.5 min |
| CEBPA              | forward   | CTGCCATGCCGGGAG                                       |
|                    | reverse   | AGATCCGGCGACCCAA                                      |
|                    | condition | Sigma Jump start PCR mix, 60 C annealing, ext 2min    |
| PXR v1 cDNA        | forward   | GGAGCCGCTTAGTGCCTACA                                  |
|                    | reverse   | GAGGTAGCAATGAAAAGACTCAGGAAG                           |
|                    | condition | Takara prime star HS, 68°C annealing, ext 2 min       |
| RXR $\alpha$ cDNA  | forward   | CGGGCATGAGTTAGTCGCA                                   |
|                    | reverse   | CAACACATCTCTTAGGCAGAGCA                               |
|                    | condition | Takara prime star HS, 68°C annealing, ext 2 min       |
| GATA4 cDNA         | forward   | CATATTATCGTTGTTGCCGTCG                                |
|                    | reverse   | GATTACGCAGTGATTATGTCCCC                               |
|                    | condition | Takara prime star HS, 68°C annealing, ext 2 min       |
